# Supplementary material
Source: MDPI journal article supplement (https://www.mdpi.com/2076-3263/10/8/302)

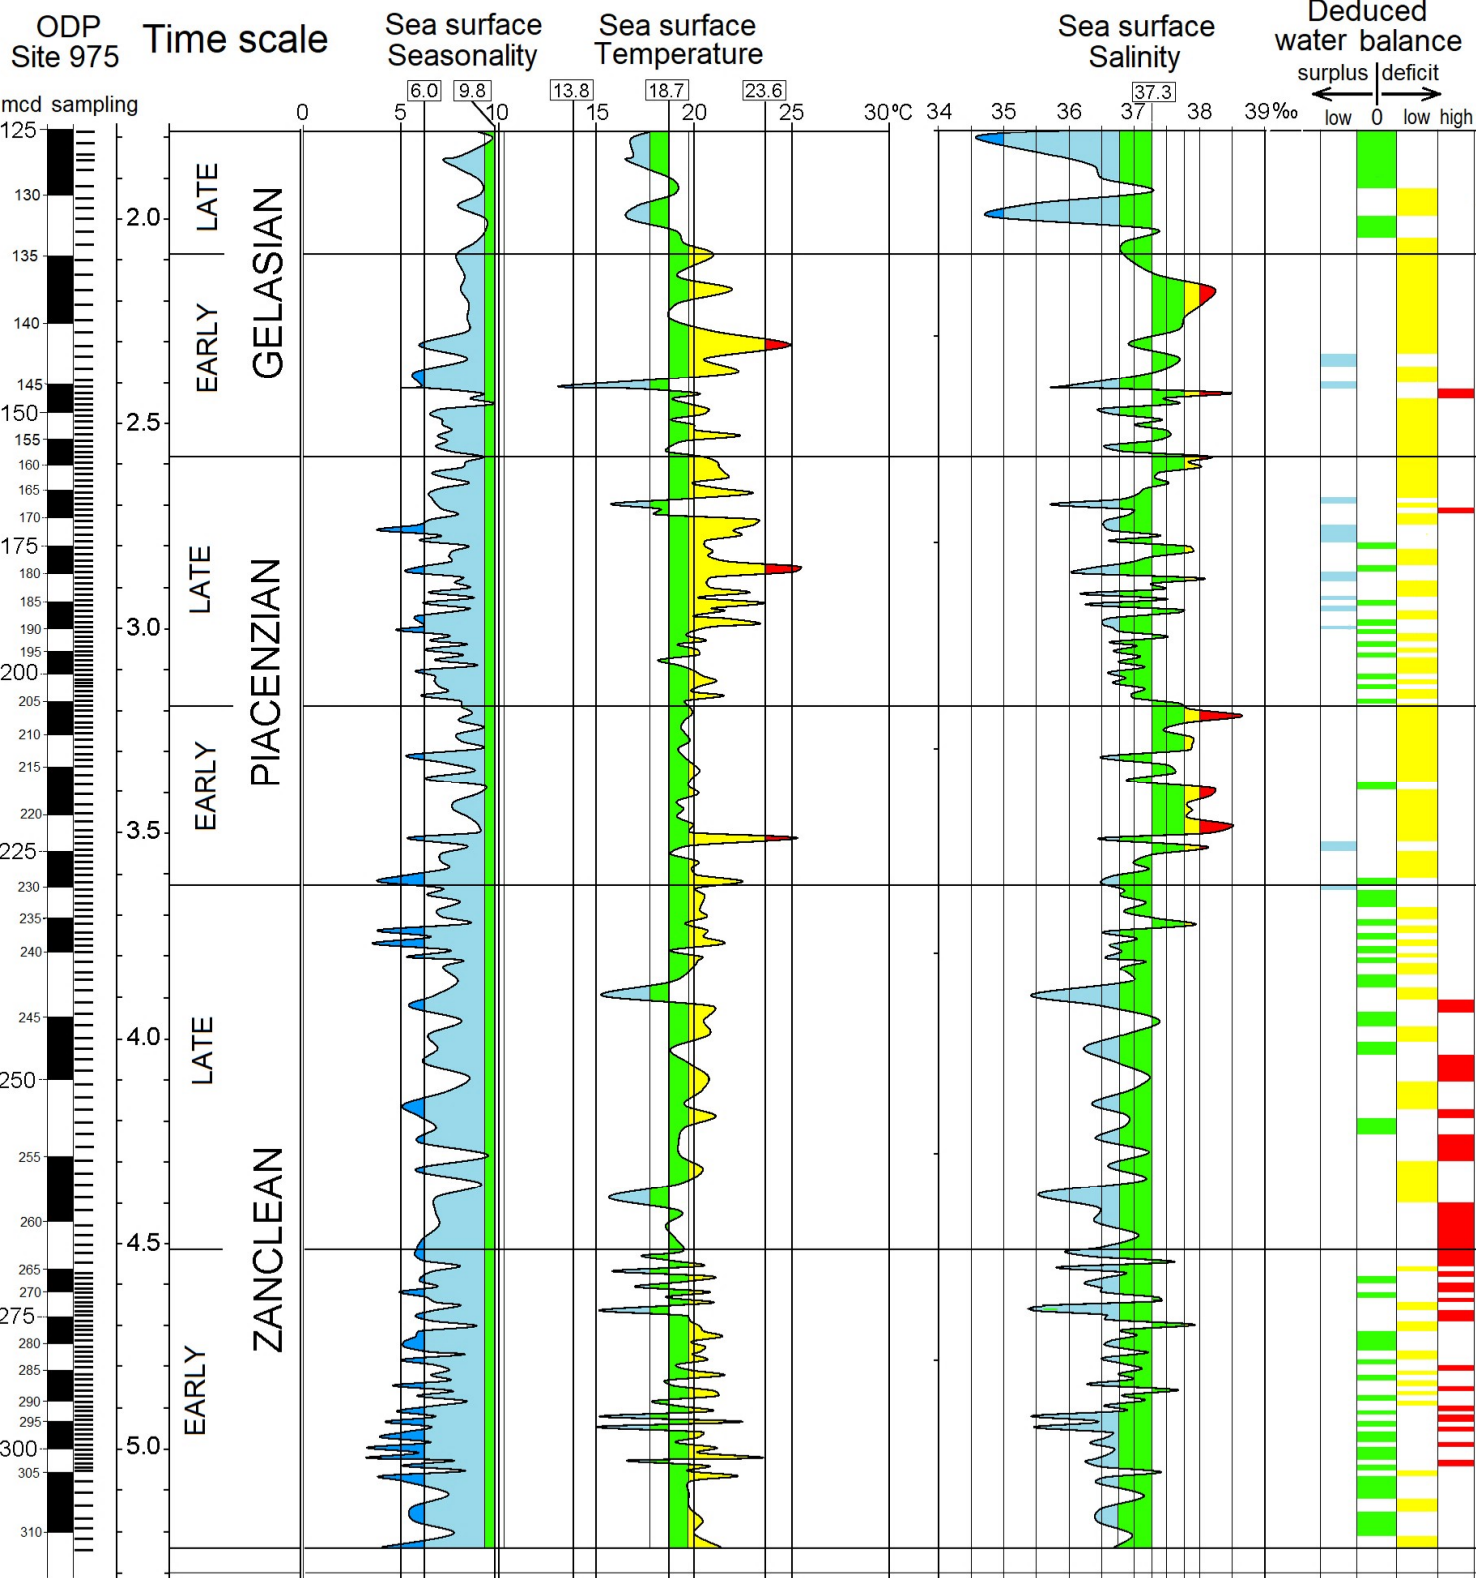

Supplement: s1 [file s1]
